# Supplementary material
Source: PubMed Central journal article supplement (PMC100292)
Supplement: nar_30_3_766__1.pdf [file nar_30_3_766__1.pdf]

**SUPPLEMENTARY MATERIAL**

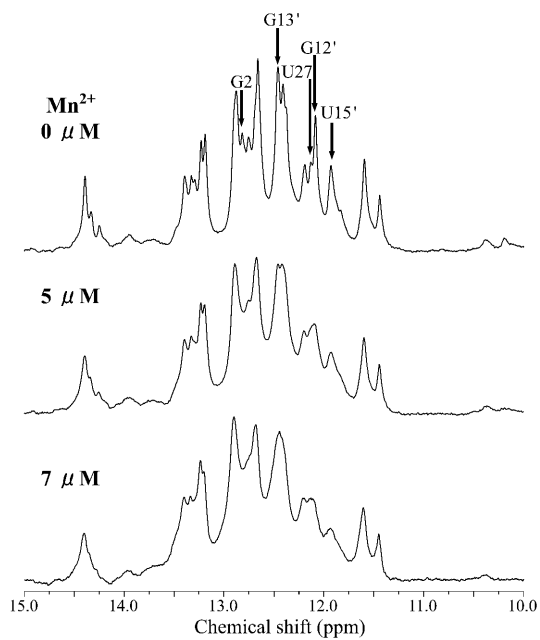

**Figure S1.** Changes in  $^1\text{H}$  spectra in the imino proton region upon titration of Rz-3 with  $\text{MnCl}_2$ .  $^1\text{H}$  spectra of Rz-3 (0.2 mM) were measured in the presence of 0, 5 and 7  $\mu\text{M}$   $\text{MnCl}_2$  at 25°C.
